# Supplementary material for: ILKAP, ILK and PINCH1 control cell survival of p53-wildtype glioblastoma cells after irradiation
Source: PubMed Central journal article supplement (PMC4741475; doi:10.18632/oncotarget.5423), 2015-10-07
Supplement: oncotarget-06-34592-s001.pdf [file oncotarget-06-34592-s001.pdf]

## SUPPLEMENTARY FIGURES AND TABLE

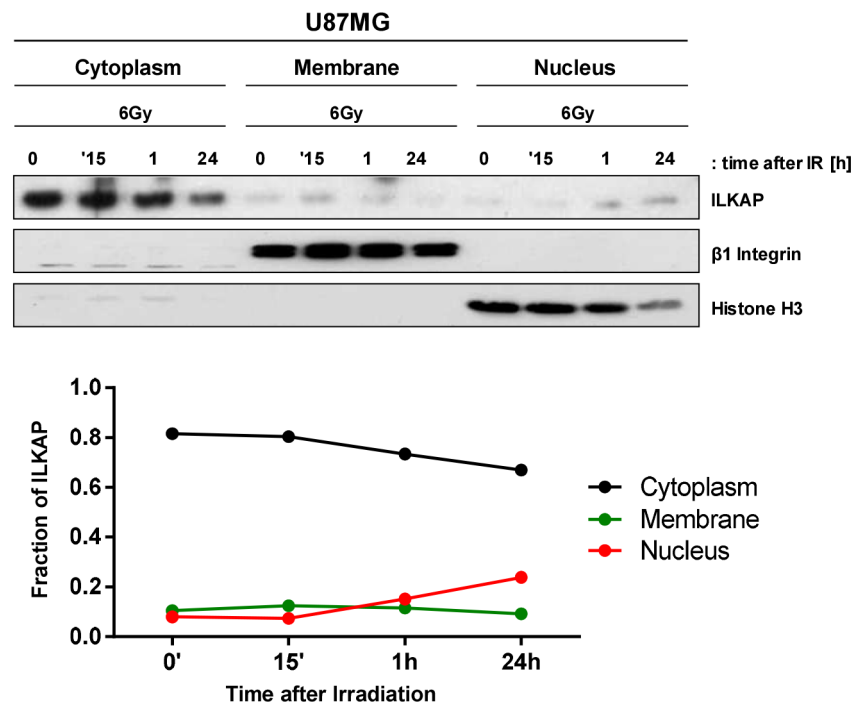

**Supplementary Figure S1: ILKAP translocated to the nucleus after irradiation.** For protein fractionation experiments, cells were plated 24 h prior to irradiation. At the indicated time points after irradiation, cells were lysed as described. Non-irradiated cells were used as controls. Detection of D1 integrin and Histone H3 were performed to confirm efficacy of fractionation. Western blots were evaluated using densitometric analysis.

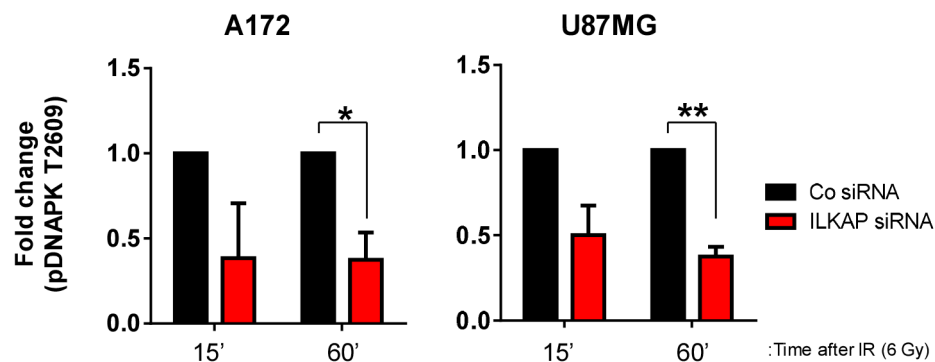

**Supplementary Figure S2: ILKAP deletion reduced radiation-induced DNAPK phosphorylation.** Densitometric analysis of Western blots in A172 and U87MG glioblastoma cells at indicated time points after irradiation with 6 Gy. ILKAP knockdown was performed with specific siRNA. Non-specific siRNA was used as control. Data are mean  $\pm$  SD ( $n = 2$ ; t-test; \* $P < 0.05$ , \*\* $P < 0.01$ ).

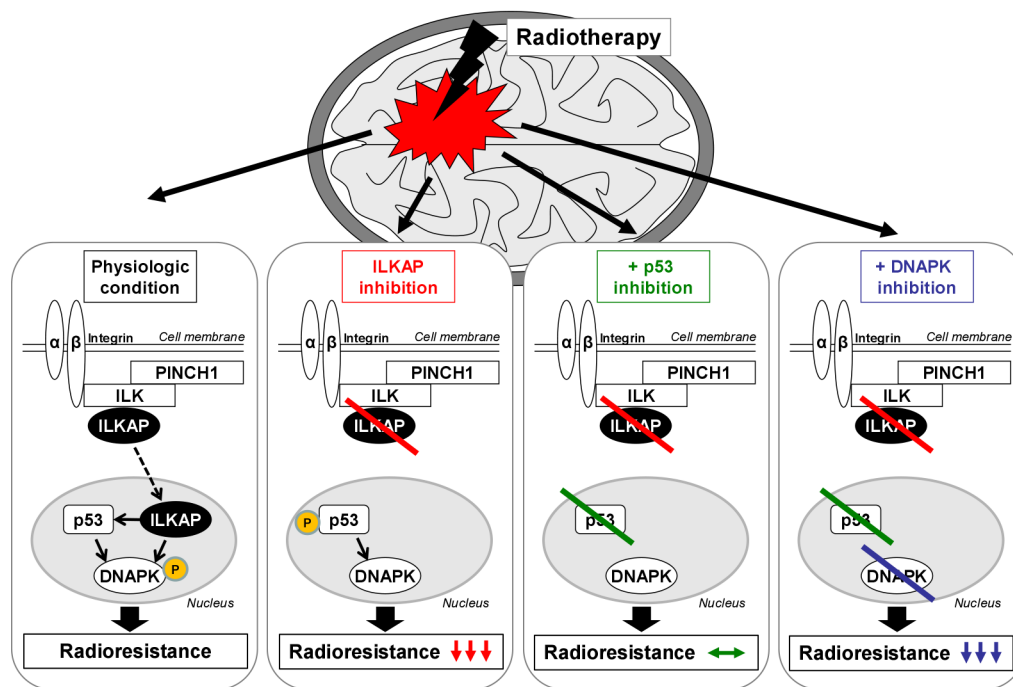

**Supplementary Figure S3: Schematic of ILKAP, p53 and DNAPK regulation of radioresistance in p53-wildtype glioblastoma cells.** Under physiologic conditions integrin-associated signaling confers radioresistance by regulating the DNA repair protein DNAPK. ILKAP knockdown results in radiosensitization, whereas a combined inhibition of ILKAP and p53 has no effect on cellular radiosensitivity. Additional targeting of DNAPK restores the radiosensitizing effect, which can be observed after single ILKAP inhibition.

**Supplementary Table S1: List of Data sets included in Microarray analysis of *PINCH1*, *ILK* and *ILKAP* mRNA expression using the oncomine database ([www.oncomine.org](http://www.oncomine.org))**

| Data sets/Publications |                                                                                                                                                                                                                                                 |
|------------------------|-------------------------------------------------------------------------------------------------------------------------------------------------------------------------------------------------------------------------------------------------|
| 1.                     | Sun L, et al. (2006) Neuronal and glioma-derived stem cell factor induces angiogenesis within the brain. <i>Cancer Cell</i> . 9(4):287–300.                                                                                                     |
| 2.                     | Bredel M, et al. (2005) Functional network analysis reveals extended gliomagenesis pathway maps and three novel MYC-interacting genes in human gliomas. <i>Cancer Res</i> . 65(19):8679–89.                                                     |
| 3.                     | Shai R, et al. (2003) Gene expression profiling identifies molecular subtypes of gliomas. <i>Oncogene</i> . 22(31):4918–23.                                                                                                                     |
| 4.                     | Liang Y, et al. (2005) Gene expression profiling reveals molecularly and clinically distinct subtypes of glioblastoma multiforme. <i>Proc Natl Acad Sci U S A</i> . 102(16):5814–9.                                                             |
| 5.                     | Murat A, et al. (2008) Stem cell-related “self-renewal” signature and high epidermal growth factor receptor expression associated with resistance to concomitant chemoradiotherapy in glioblastoma. <i>J Clin Oncol</i> . 26(18):3015–24.       |
| 6.                     | Lee J, et al. (2006) Tumor stem cells derived from glioblastomas cultured in bFGF and EGF more closely mirror the phenotype and genotype of primary tumors than do serum-cultured cell lines. <i>Cancer Cell</i> . 9(5):391–403.                |
| 7.                     | National Cancer Institute, National Institutes of Health, Bethesda, MD 20892 (2013) The Cancer Genome Atlas - Glioblastoma Multiforme Gene Expression Data. <a href="http://tcga-data.nci.nih.gov/tcga/">http://tcga-data.nci.nih.gov/tcga/</a> |
